# Supplementary material for: Inverse vulcanization of trimethoxyvinylsilane particles
Source: Royal Society of Chemistry journal article supplement (doi:10.1039/d2py00773h), 2022-01-01
Supplement: d2py00773h1.pdf [file d2py00773h1.pdf]

Supporting Information (SI) for:

## **Inverse Vulcanization of Trimethoxyvinylsilane Particles**

*Alexander P. Grimm,<sup>a</sup> Johannes M. Scheiger,<sup>b</sup> Peter W.  
Roesky,<sup>c</sup> Patrick Théato<sup>\*ad</sup>*

<sup>a</sup> Institute for Chemical Technology and Polymer Chemistry (ITCP), Karlsruhe Institute of Technology (KIT), Engesserstr. 18, 76131 Karlsruhe, Germany.

<sup>b</sup> Institute of Biological and Chemical Systems – Functional Molecular Systems (IBCS-FMS), Karlsruhe Institute of Technology (KIT), Herrmann-von-Helmholtz-Platz 1, 76344 Eggenstein-Leopoldshafen, Germany.

<sup>c</sup> Institute of Inorganic Chemistry (AOC), Karlsruhe Institute of Technology (KIT), Engesserstr. 15, 76131 Karlsruhe, Germany.

<sup>d</sup> Institute for Biological Interfaces III (IBG-3), Karlsruhe Institute of Technology (KIT), Hermann-von-Helmholtz-Platz 1, 76344 Eggenstein-Leopoldshafen, Germany.

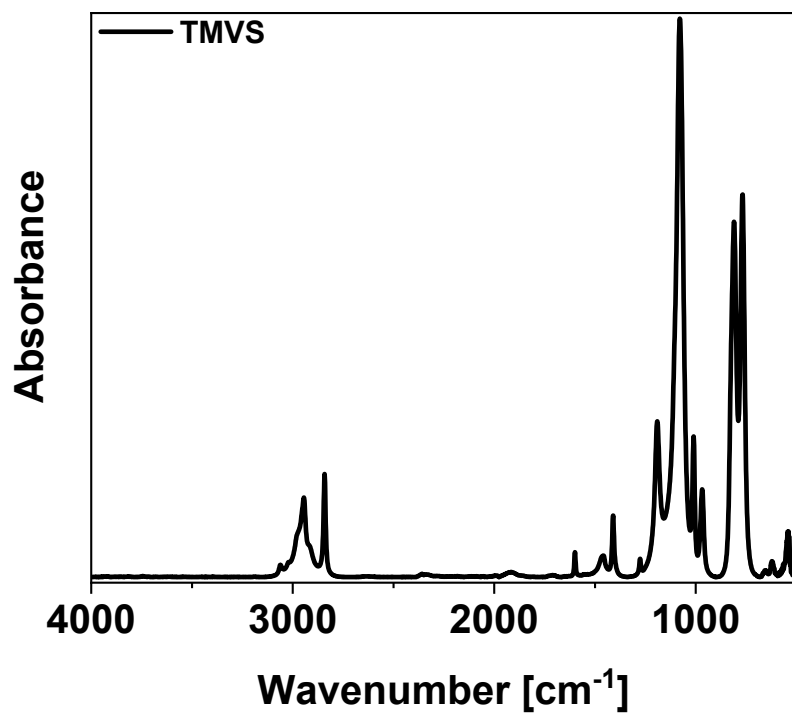

Figure S1: ATR FT-IR spectrum of trimethoxyvinylsilane. Resolution: 2 cm<sup>-1</sup>.

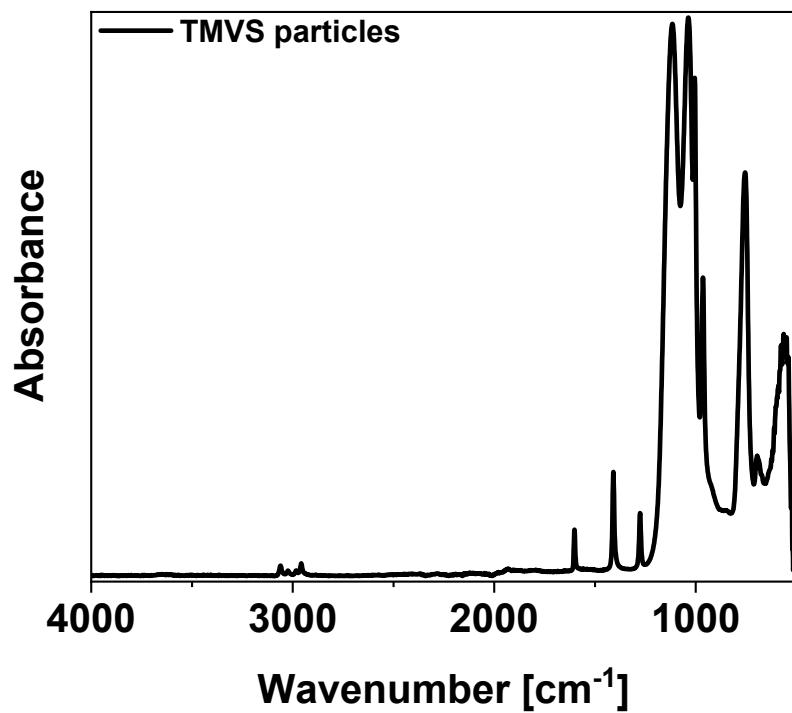

Figure S2: ATR FT-IR spectrum of vinylated trimethoxyvinylsilane particles. Resolution: 2 cm<sup>-1</sup>.

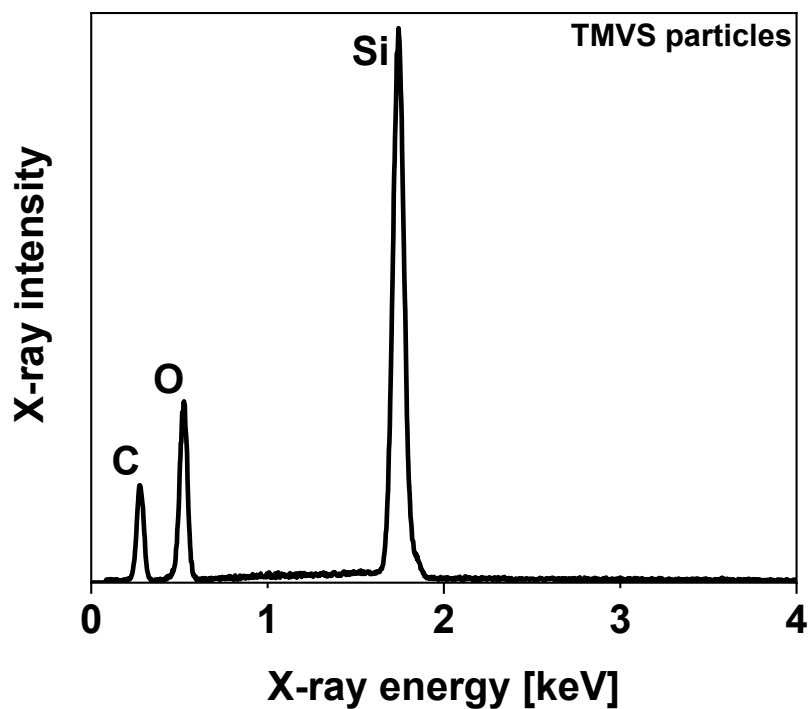

Figure S3: EDX spectrum of trimethoxyvinylsilane particles. Accelerating voltage: 10 kV.

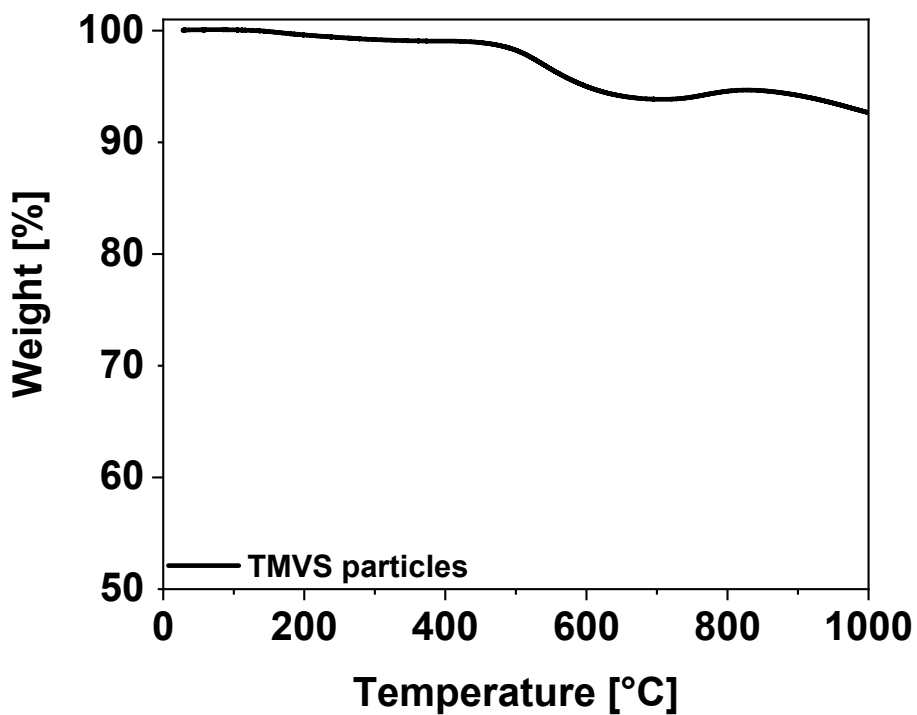

Figure S4: Thermogram of vinylated trimethoxyvinylsilane particles. Heating rate: 10 K min<sup>-1</sup>.

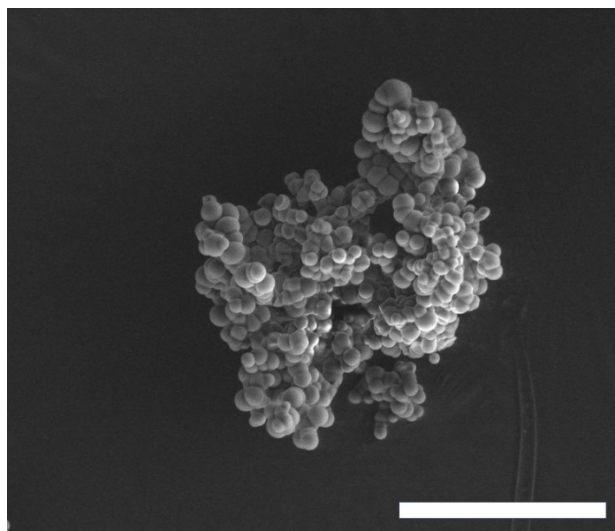

Figure S5: SEM image of vinylated trimethoxyvinylsilane particles after 240 min growing time. Scalebar: 20  $\mu\text{m}$ .

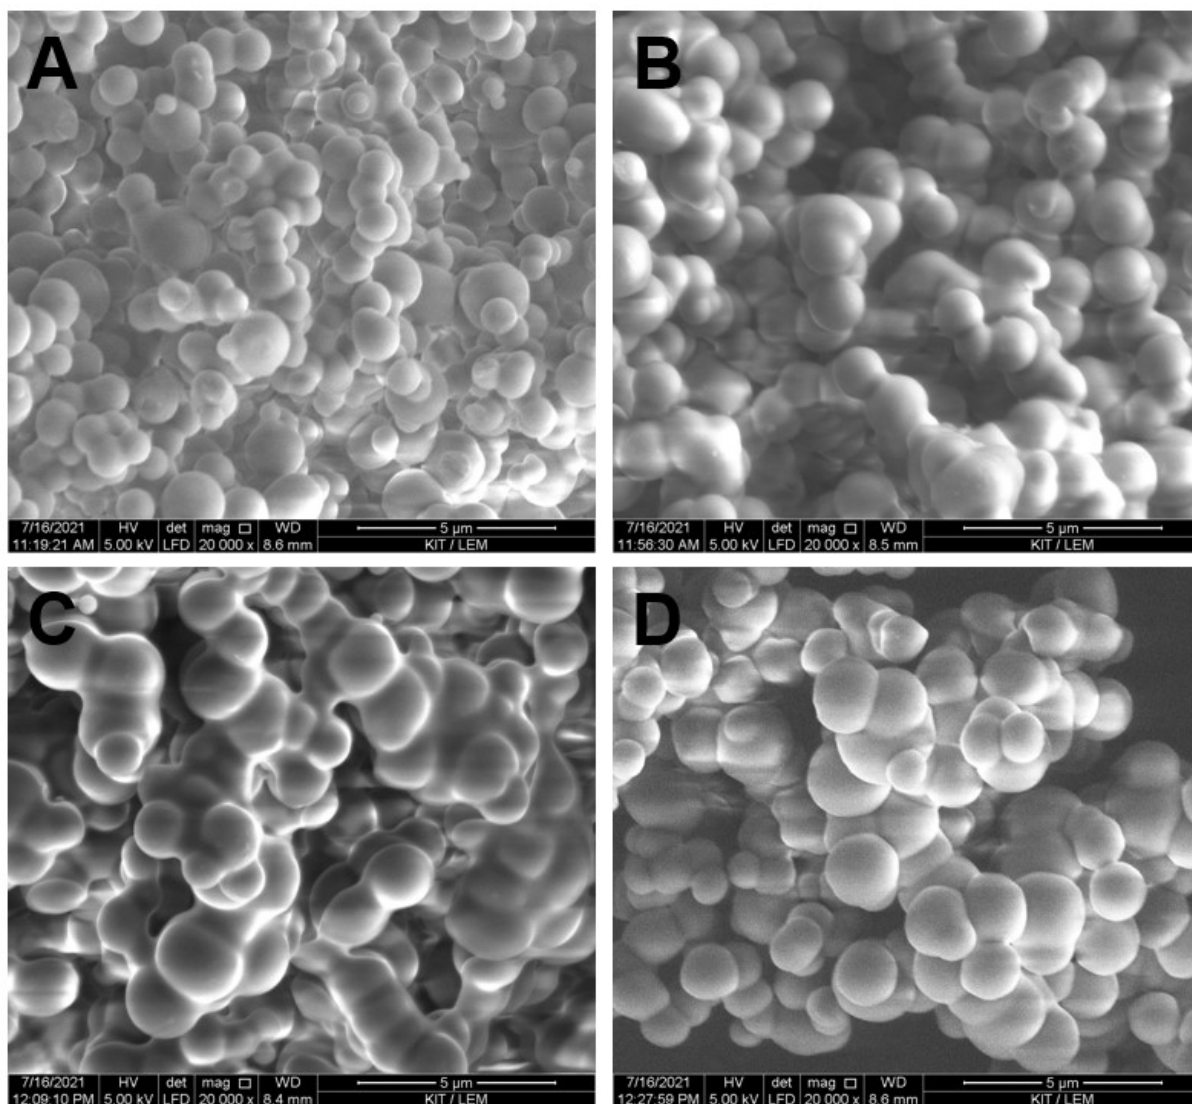

Figure S6: SEM images of vinylated trimethoxyvinylsilane particles after 30 (A), 60 (B), 120 (C), and 240 min (D) growing time. Average particle diameters are: 0.91  $\mu\text{m}$  (SD: 0.41  $\mu\text{m}$ ), 1.28  $\mu\text{m}$  (SD: 0.26  $\mu\text{m}$ ), 1.62  $\mu\text{m}$  (SD: 9.47  $\mu\text{m}$ ), and 1.52  $\mu\text{m}$  (SD: 0.43  $\mu\text{m}$ ), respectively. Scalebars: 5  $\mu\text{m}$ .

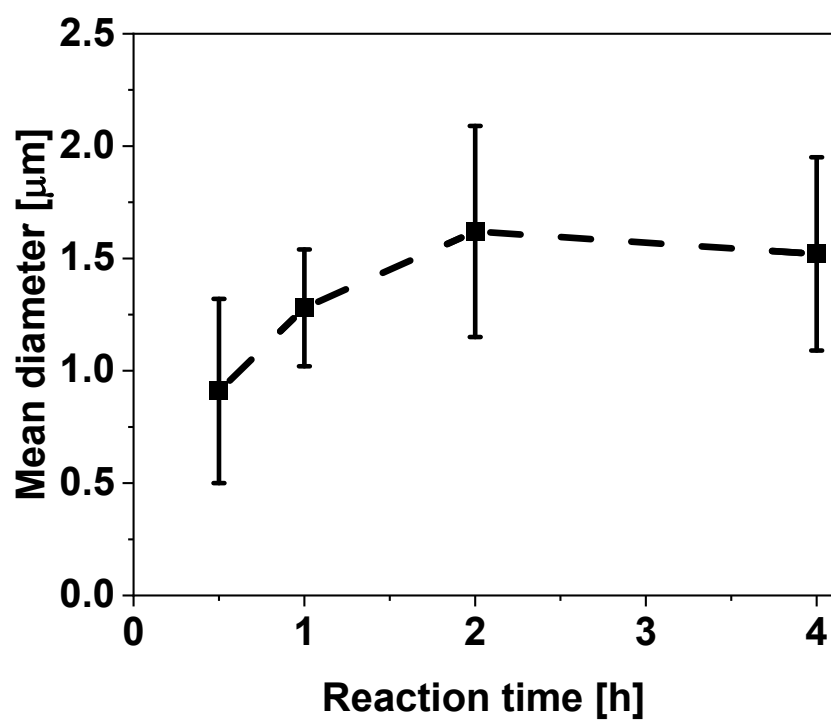

Figure S7: Respective average particle size of vinylated trimethoxyvinylsilane particles after 0.5, 1, 2, and 4 hours growing time. Standard deviation included as error bars.

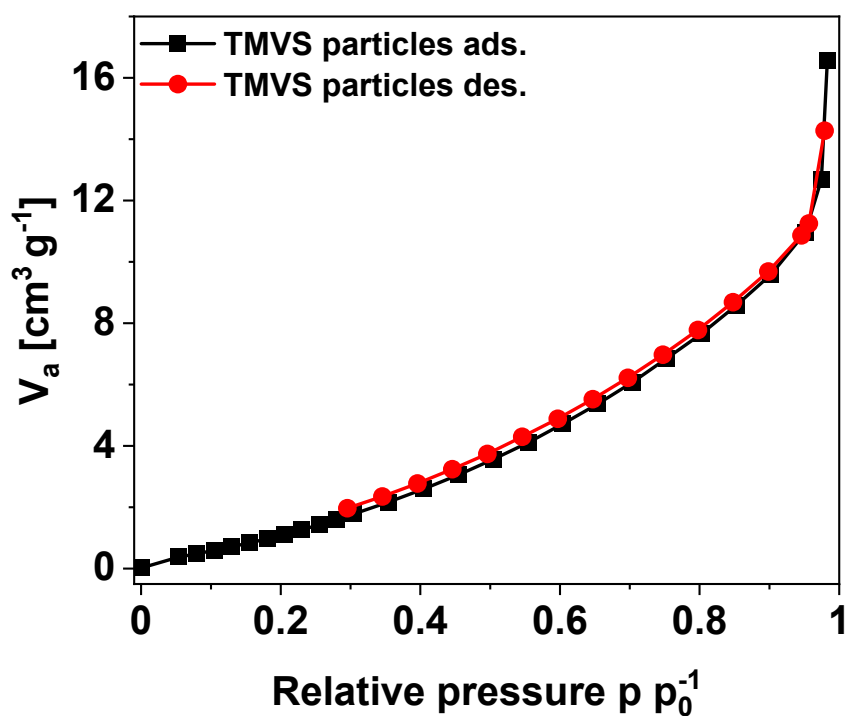

Figure S8: Adsorption (black) and desorption (red) isotherm of  $\text{N}_2$  of TMVS particles.

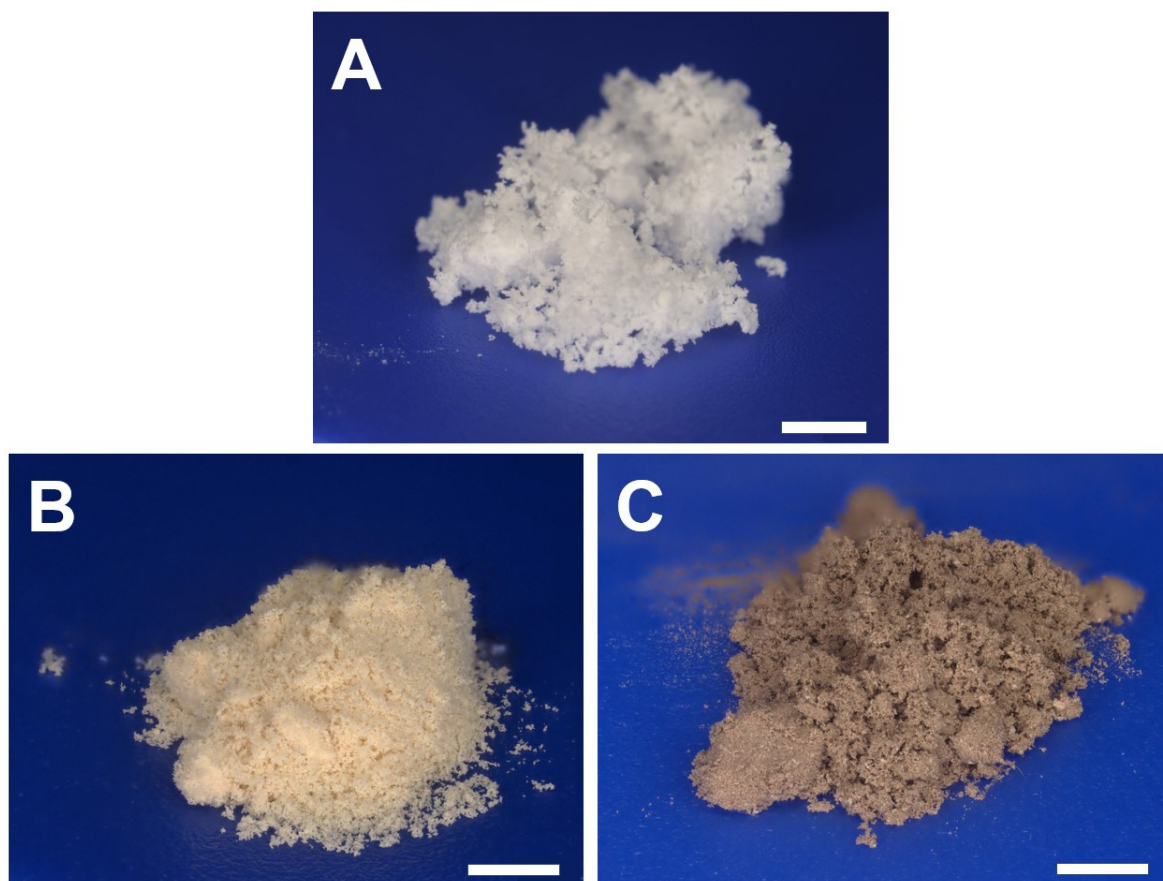

Figure S9: Digital light microscopy images of trimethoxyvinylsilane particles (A), inverse vulcanized trimethoxyvinylsilane-sulfur particles (B), and post-modified trimethoxyvinylsilane-sulfur-*N*-vinylimidazole particles (C). Scalebars: 2 mm (A) and 1 mm (B and C).

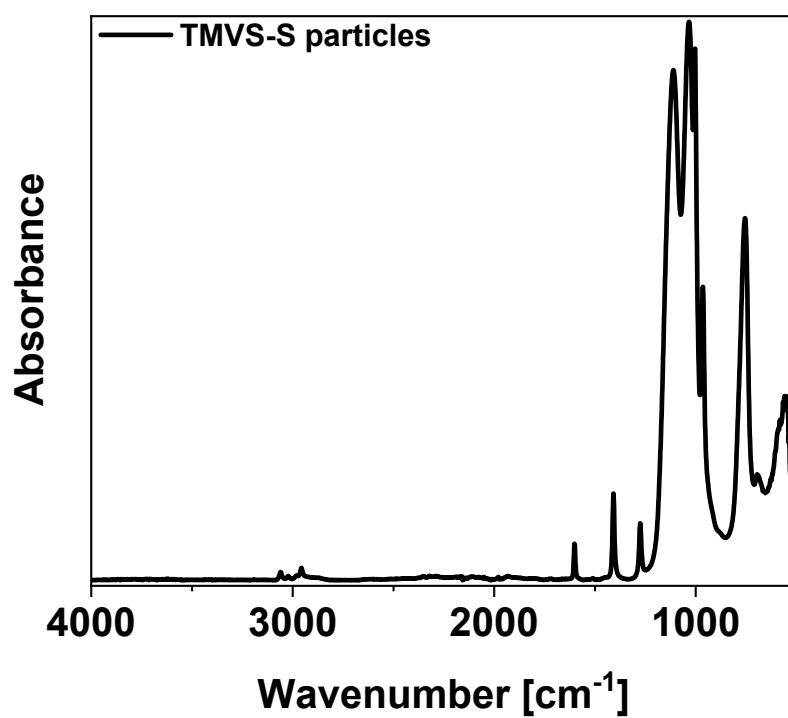

Figure S10: ATR FT-IR spectrum of inverse vulcanized trimethoxyvinylsilane-sulfur particles. Resolution: 2 cm<sup>-1</sup>.

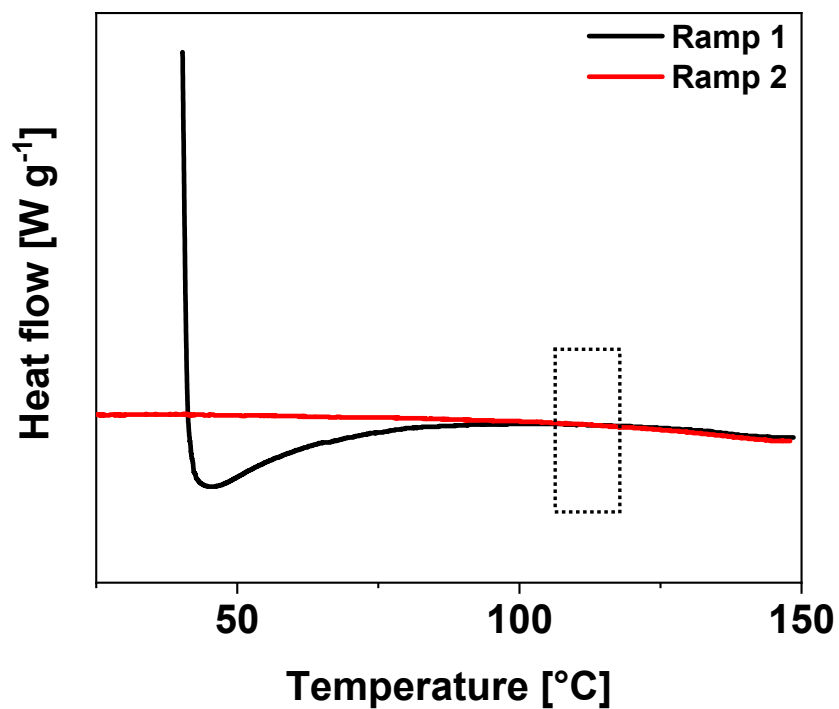

Figure S11: DSC curves of TMVS-S particles. The melting area of residual sulfur is highlighted by the dotted line. Heat rate: 10 K min<sup>-1</sup>. Exo up.

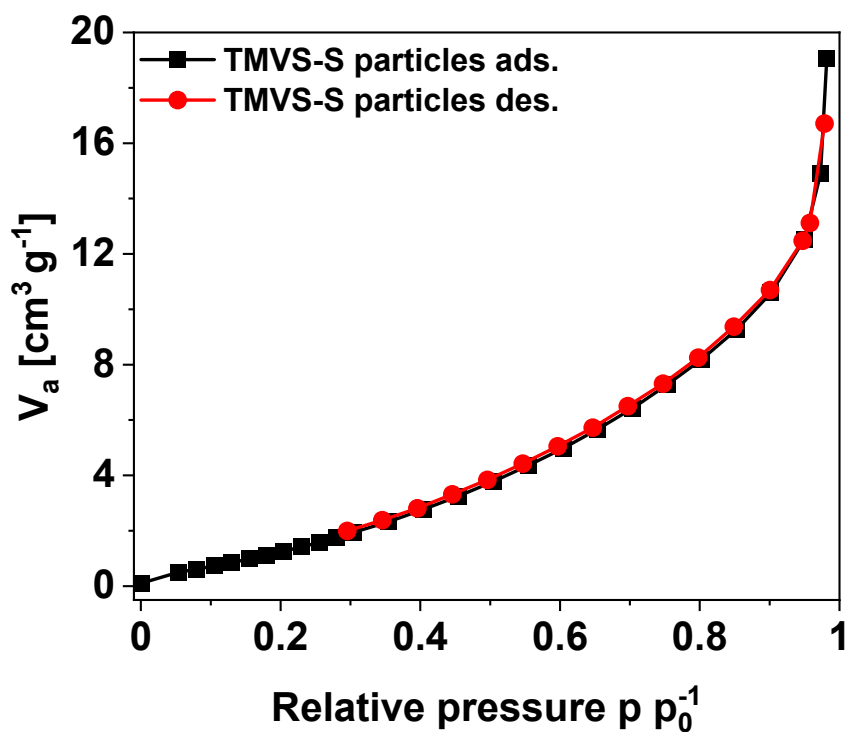

Figure S12: Adsorption (black) and desorption (red) isotherm of N<sub>2</sub> of TMVS-S particles.

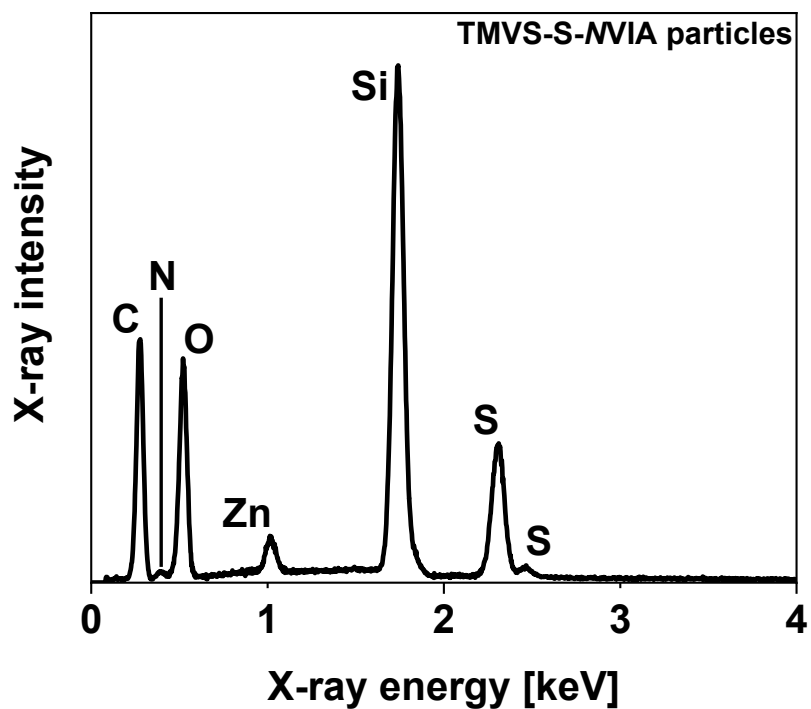

Figure S13: EDX spectrum of trimethoxyvinylsilane-sulfur-*N*-vinylimidazole particles. Accelerating voltage: 10 kV.

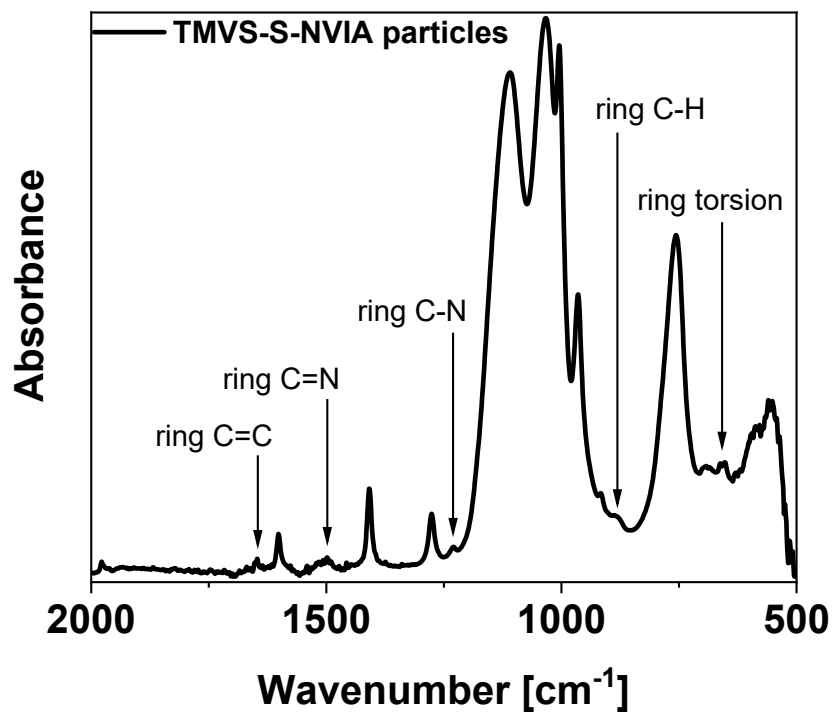

Figure S14: ATR FT-IR spectrum of trimethoxyvinylsilane-sulfur-*N*-vinylimidazole particles. Resolution: 2 cm<sup>-1</sup>.



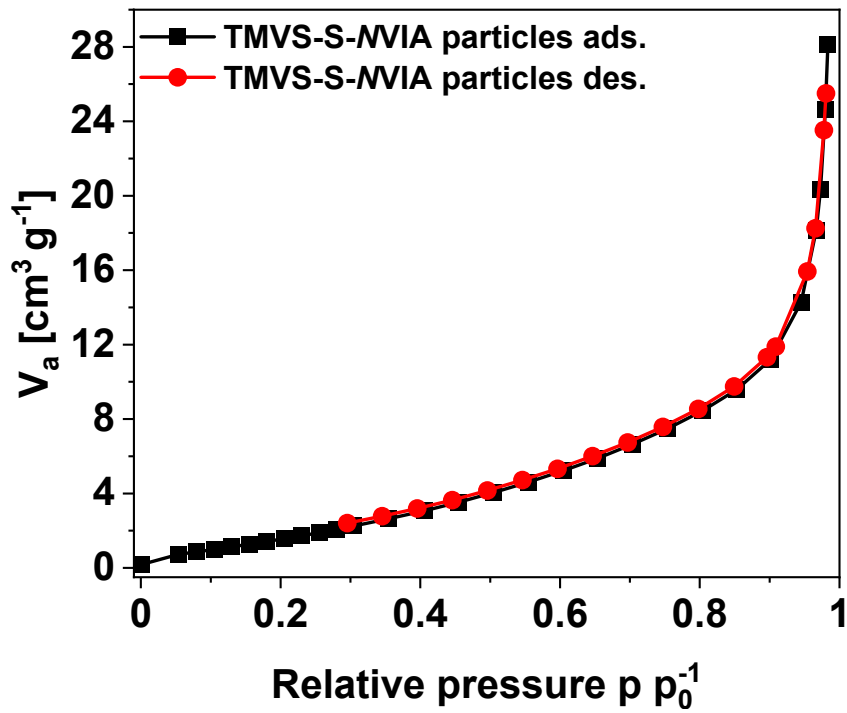

Figure S15: Adsorption (black) and desorption (red) isotherm of  $N_2$  of TMVS-S-NVIA particles.

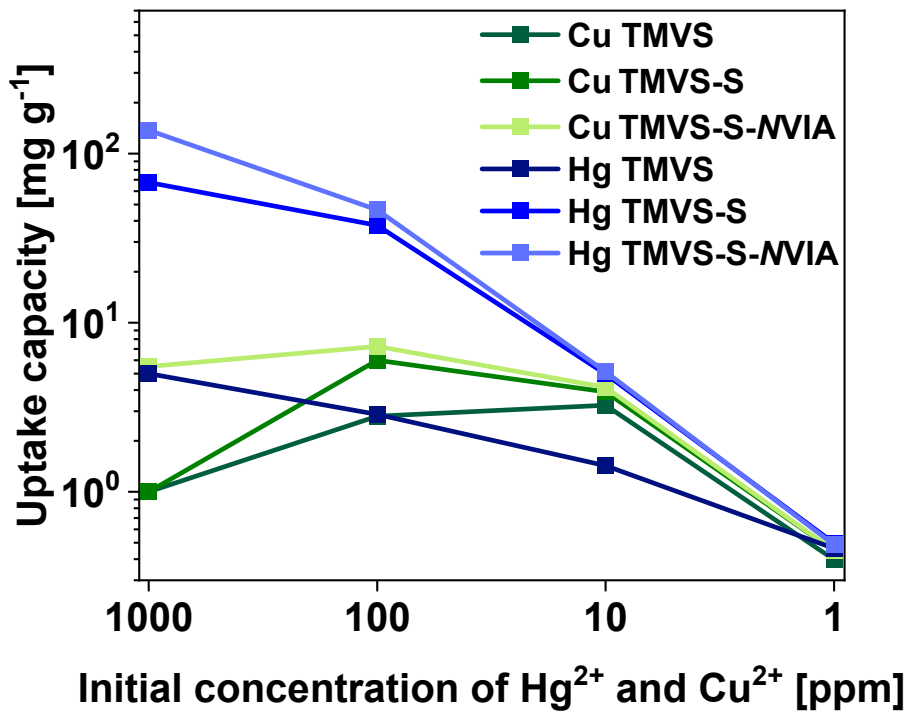

Figure S16: Uptake capacities of TMVS-S particles and TMVS-S-NVIA particles plotted against the initial concentration of  $Hg^{2+}$  and  $Cu^{2+}$  ions in aqueous solution.  $V$  (solution) = 100 mL,  $m$  (particles) = 200 mg,  $t$  = 24 h.

Table S1: Distribution coefficients and uptake capacities of copper(II) and mercury(II) ions of TMVS particles in dependency of initial metal concentration; V = 100 mL, m = 200 mg, t = 24 hours.

| Ion              | Initial concentration [ppm] | Removed [%] | Distribution coefficient [ml g <sup>-1</sup> ] | Uptake capacity [mg g <sup>-1</sup> ] |
|------------------|-----------------------------|-------------|------------------------------------------------|---------------------------------------|
| Cu <sup>2+</sup> | 1000                        | 0.20        | 0.98                                           | 1.00                                  |
|                  | 100                         | 6.22        | 33.18                                          | 2.80                                  |
|                  | 10                          | 65.66       | 955.88                                         | 3.25                                  |
|                  | 1                           | 99.38       | 79500.00                                       | 0.40                                  |
| Hg <sup>2+</sup> | 1000                        | 1.00        | 5.05                                           | 5.00                                  |
|                  | 100                         | 5.75        | 30.53                                          | 2.87                                  |
|                  | 10                          | 28.61       | 200.42                                         | 1.43                                  |
|                  | 1                           | 92.98       | 6621.43                                        | 0.46                                  |

Table S2: Distribution coefficients and uptake capacities of copper(II) and mercury(II) ions of TMVS-S particles in dependency of initial metal concentration; V = 100 mL, m = 200 mg, t = 24 hours.

| Ion              | Initial concentration [ppm] | Removed [%] | Distribution coefficient [ml g <sup>-1</sup> ] | Uptake capacity [mg g <sup>-1</sup> ] |
|------------------|-----------------------------|-------------|------------------------------------------------|---------------------------------------|
| Cu <sup>2+</sup> | 1000                        | 0.20        | 1.00                                           | 1.00                                  |
|                  | 100                         | 12.12       | 68.97                                          | 6.00                                  |
|                  | 10                          | 78.79       | 1857.14                                        | 3.90                                  |
|                  | 1                           | 99.44       | 89500.00                                       | 0.45                                  |
| Hg <sup>2+</sup> | 1000                        | 13.53       | 78.22                                          | 67.50                                 |
|                  | 100                         | 75.54       | 1543.85                                        | 37.67                                 |
|                  | 10                          | 99.87       | 383115.39                                      | 4.98                                  |
|                  | 1                           | 99.70       | 165666.67                                      | 0.50                                  |

Table S3: Distribution coefficients and uptake capacities of copper(II) and mercury(II) ions of TMVS-S-NVIA particles in dependency of initial metal concentration; V = 100 mL, m = 200 mg, t = 24 hours.

| Ion              | Initial concentration [ppm] | Removed [%] | Distribution coefficient [ml g <sup>-1</sup> ] | Uptake capacity [mg g <sup>-1</sup> ] |
|------------------|-----------------------------|-------------|------------------------------------------------|---------------------------------------|
| Cu <sup>2+</sup> | 1000                        | 1.08        | 5.43                                           | 5.50                                  |
|                  | 100                         | 14.65       | 85.80                                          | 7.25                                  |
|                  | 10                          | 97.65       | 20750.00                                       | 4.15                                  |
|                  | 1                           | 99.44       | 89500.00                                       | 0.45                                  |
| Hg <sup>2+</sup> | 1000                        | 28.35       | 197.84                                         | 137.50                                |
|                  | 100                         | 97.74       | 21616.28                                       | 46.48                                 |
|                  | 10                          | 99.74       | 192383.90                                      | 5.14                                  |
|                  | 1                           | 99.53       | 105586.96                                      | 0.49                                  |
